# Supplementary material for: MiRNA-101 inhibits breast cancer growth and metastasis by targeting CX chemokine receptor 7
Source: PubMed Central journal article supplement (PMC4741570; doi:10.18632/oncotarget.5067), 2015-09-01
Supplement: oncotarget-06-30818-s001.pdf [file oncotarget-06-30818-s001.pdf]

SUPPLEMENTARY FIGURES AND TABLES

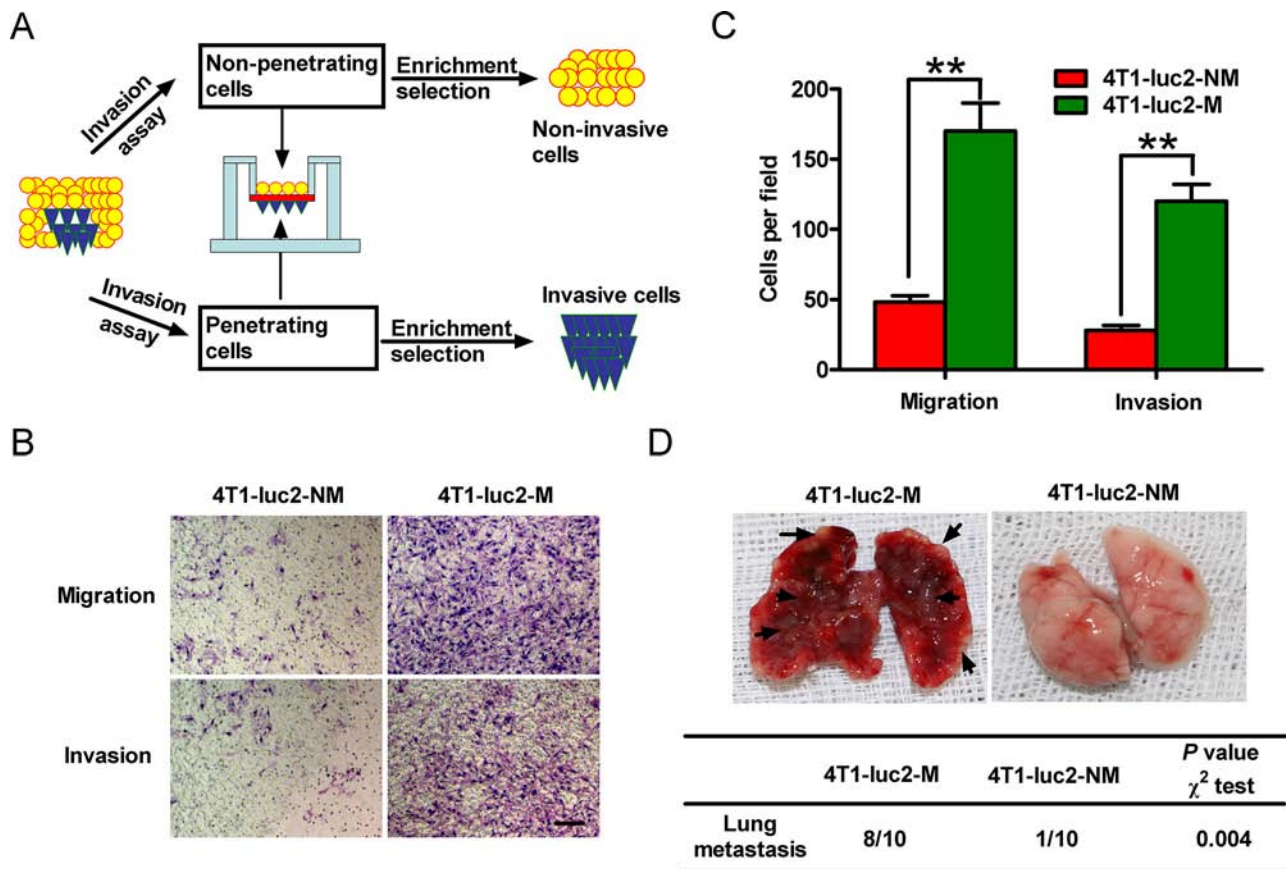

**Supplementary Figure S1: Metastatic characteristics of BrC cell sublines.** **A.** Overview of the establishment of invasive and non-invasive sublines derived from the mouse 4T1-luc2 BrC cell line. **B, C.** *In vitro* migration and invasion activities of the BrC cell sublines. The activities were measured *in vitro* using transwell chambers, as described in the Materials and Methods. (B) Representative fields of invasive cells on the membrane. (C) Data represent the mean  $\pm$  SD of three replicates.  $**P < 0.01$ . Scale bar = 10  $\mu$ m. **D.** Metastatic potentials of the BrC cell sublines *in vivo* ( $n = 10$ ). The formation and incidences of lung metastasis in mice that received intravenous tail injections of the cell sublines (4T1-luc2-NM and 4T1-luc2-M). Representative images of mouse lungs are shown.

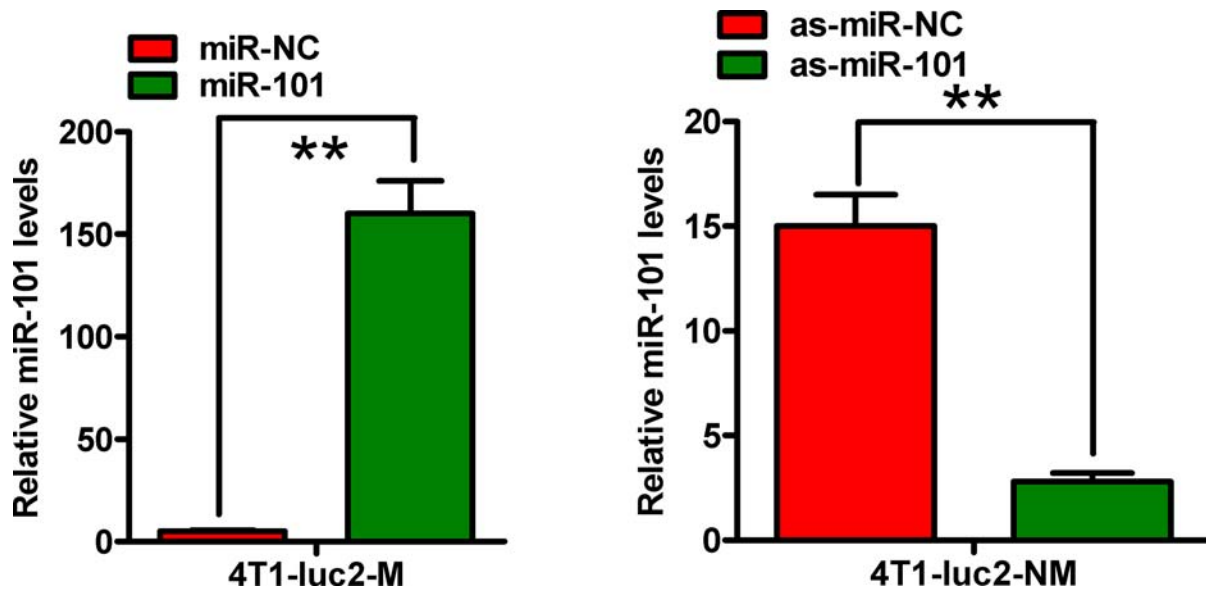

**Supplementary Figure S2: MiR-101 expression in 4T1-luc2-M and 4T1-luc2-NM cell lines subjected to different treatments.** Quantitative RT-PCR assays of 4T1-luc2-M cells transfected with miR-101 mimics or a negative control mimic (miR-NC), and 4T1-luc2-NM cells transfected with as-miR-101 or as-miR-NC. The expression level of miR-101 was normalized to that of U6 RNA. Data represent the mean  $\pm$  SD of three replicates.  $**P < 0.01$ .

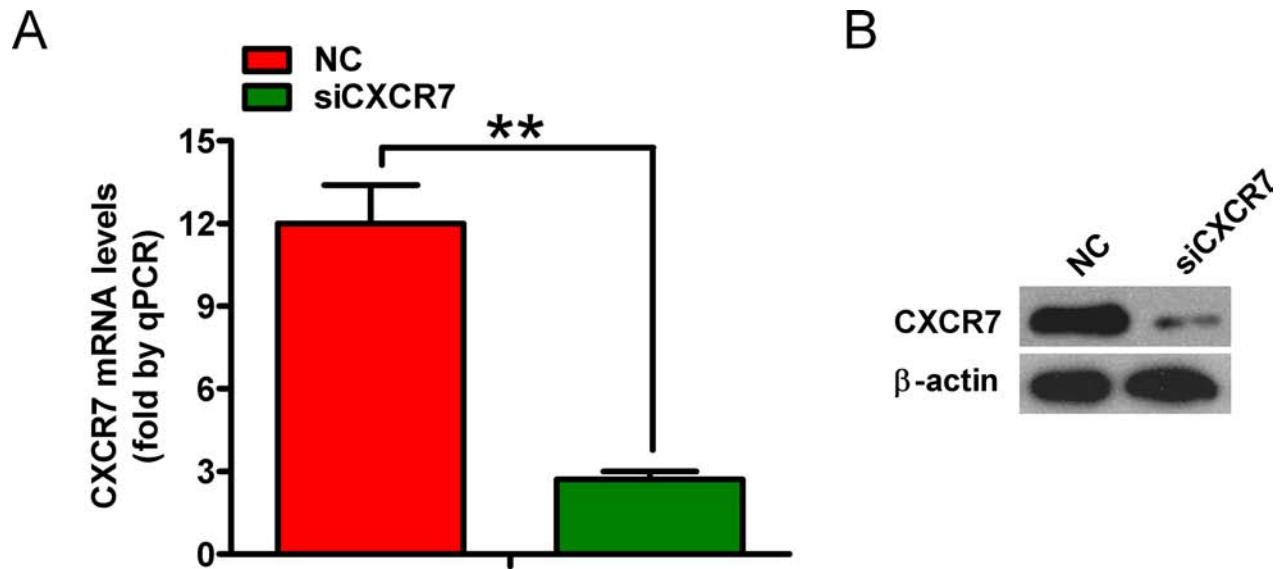

**Supplementary Figure S3: The knockdown efficiency of siCXCR7.** A, B. Quantitative RT-PCR (A) and western blot (B) analyses of CXCR7 expression in 4T1-luc2-M cells transfected with 100 nM siCXCR7 or the corresponding siNC control. The CXCR7 mRNA expression level was normalized to that of *GAPDH*, and the expression level of  $\beta$ -actin was used as a control for western blotting. (A) Data are represented as the mean  $\pm$  SD of three replicates.  $**P < 0.01$ . (B) A representative western blot is shown.

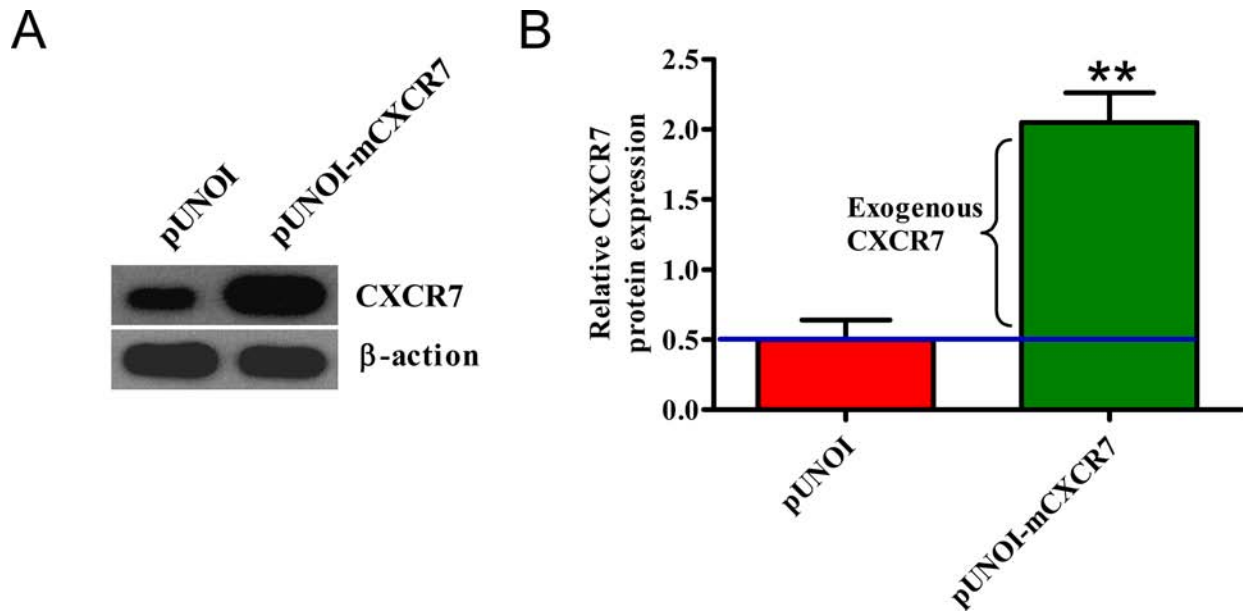

**Supplementary Figure S4: Exogenous CXCR7 protein expression in 4T1-luc2-M cells transfected with a CXCR7 plasmid.** **A.** Western blot analyses of CXCR7 expression in 4T1-luc2-M cells transfected with pUNOI or pUNOI-mCXCR7 plasmid. **B.** The relative CXCR7 protein expression in the above groups. Exogenous CXCR7 protein expression was indicated. The CXCR7 protein expression level was normalized to that of  $\beta$ -actin. (A) A representative western blot is shown. (B) Data are represented as the mean  $\pm$  SD of three replicates. \*\* $P < 0.01$ .

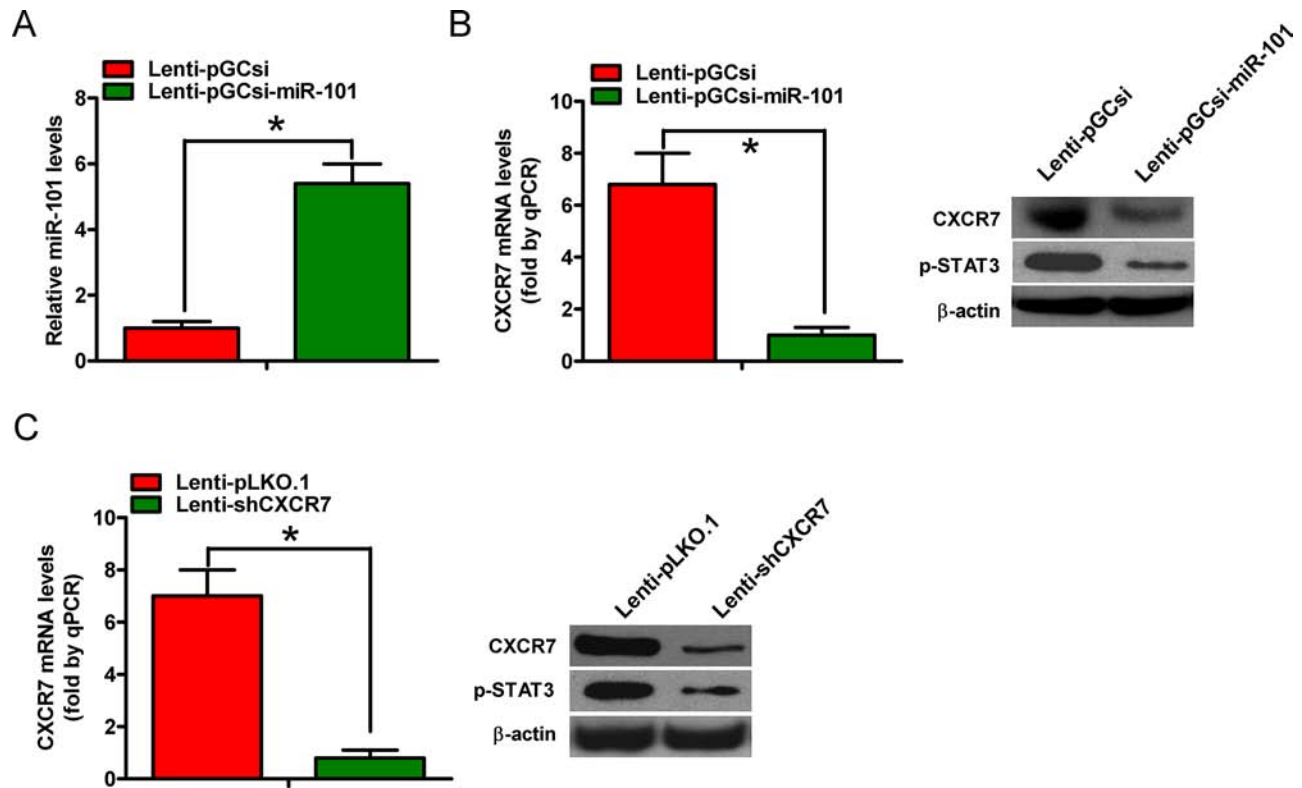

**Supplementary Figure S5: Overexpression of miR-101 and knockdown of CXCR7 in xenograft tumors.** Female BALB/c mice (5–7 weeks old) were injected subcutaneously with 4T1-luc2-M cells that were infected with a control lentivirus (Lenti-pGCsi or Lenti-pLKO.1) or a recombinant lentivirus expressing a miR-101 precursor (Lenti-pGCsi-miR-101) or shCXCR7 (Lenti-shCXCR7) ( $n = 5$  mice/group). The tumors were removed 6 weeks after subcutaneous xenografting. **A.** A qRT-PCR analysis of miR-101 expression in xenograft tumors derived from 4T1-luc2-M cells that were infected with Lenti-pGCsi or Lenti-pGCsi-miR-101. The expression level of miR-101 was normalized to that of U6 RNA. **B.** Western blot and qRT-PCR analyses of CXCR7 protein and mRNA levels in xenograft tumors derived from 4T1-luc2-M cells that were infected with Lenti-pGCsi or Lenti-pGCsi-miR-101. **C.** Western blot and qRT-PCR analyses of CXCR7, and p-STAT3 protein and mRNA levels in xenograft tumors derived from 4T1-luc2-M cells that were infected with Lenti-pLKO.1 or Lenti-shCXCR7. (A–C) Data represent the mean  $\pm$  SD of three replicates. \* $P < 0.05$ . (B, C) The *CXCR7* mRNA expression level was normalized to that of *GAPDH*, and the expression level of  $\beta$ -actin was used as a control for western blotting. Representative western blots are shown.

**Supplementary Table S1. Correlations between CXCR7 protein levels and the clinicopathological characteristics of BrC patients**

| Clinical pathology | CXCR7 levels (IHC) |     |            | N   | P-value  |
|--------------------|--------------------|-----|------------|-----|----------|
|                    | - or +             | ++  | +++or ++++ |     |          |
| Age (years):       |                    |     |            |     |          |
| ≤63                | 27                 | 37  | 70         | 134 | 0.0894   |
| >63                | 32                 | 29  | 53         | 114 |          |
| Carcinoma:         |                    |     |            |     |          |
| Primary            | 61                 | 63  | 124        | 248 | <0.0001* |
| Adjacent           | 127                | 118 | 3          | 248 |          |
| Clinical stage:    |                    |     |            |     |          |
| I                  | 16                 | 12  | 14         | 42  | 0.0003*  |
| II                 | 13                 | 15  | 50         | 78  |          |
| III                | 32                 | 37  | 59         | 128 |          |
| Lymph node status: |                    |     |            |     |          |
| Metastasis         | 23                 | 41  | 83         | 147 | <0.0001* |
| No metastasis      | 38                 | 26  | 37         | 101 |          |

The *P*-values were calculated using chi-square tests of CXCR7 levels in the different subgroups.

\**P* < 0.05.

**Supplementary Table S2. The primers used to generate the WT and MUT *CXCR7* 3'-UTRs**

| Gene                      | Primer sequences (5' to 3') |                                      |
|---------------------------|-----------------------------|--------------------------------------|
| <i>CXCR7</i> 3'-UTR(WT)   | Forward                     | GAATTCGACGGGTTTACTTGTTTT             |
|                           | Reverse                     | CTGCAGGGAAACAAAAATCTTTAT             |
| <i>CXCR7</i> 3'-UTR (MUT) | Forward                     | CACCAATAGTGAGAAATATTTCACTTAAAATTTAC  |
|                           | Reverse                     | GTATTTAAATTTTAAGTGAAATATTTCTCACTATTG |

**Supplementary Table S3. The siRNAs and miRNA mimics/inhibitor used in the study**

| Gene                   | Sequences (5' to 3')                      |                       |
|------------------------|-------------------------------------------|-----------------------|
| siRNA CXCR7            | Sense                                     | GGAGAGCGUGUAGAGCAGGTT |
|                        | Antisense                                 | CCUGCUCUACACGCUCUCCTT |
| Negative control siRNA | Sense                                     | UUCUCCGAACGUGUCACGUTT |
|                        | Antisense                                 | ACGUGACACGUUCGGAGAATT |
| miR-101 mimic          | Syn-mmu-miR-101 miScript miRNA Mimic      |                       |
| miR-NC                 | AllStars Neg. Control siRNA               |                       |
| as-miR-101             | Anti-mmu-miR-101 miScript miRNA Inhibitor |                       |
| as-miR-NC              | miScript Inhibitor Neg. Control           |                       |



**Supplementary Table S4. The primers used for qRT-PCR analyses**

| Gene         | Primer sequences (5' to 3') |                                  |
|--------------|-----------------------------|----------------------------------|
| miR-101      | Forward                     | CTACAGTACTGTGATAACTGAA           |
|              | Reverse                     | Universal Primer (QIAGEN)        |
| U6           | Forward                     | RNU6B_2 miScript Primer (QIAGEN) |
|              | Reverse                     | Universal Primer (QIAGEN)        |
| <i>CXCR7</i> | Forward                     | AGCCTGGCAACTACTCTGACA            |
|              | Reverse                     | GAAGCACGTTCTTGTTAGGCA            |
| <i>GAPDH</i> | Forward                     | AGGTCGGTGTGAACGGATTTG            |
|              | Reverse                     | TGTAGACCATGTAGTTGAGGTCA          |
